# Supplementary material
Source: PubMed Central journal article supplement (PMC4054159)
Supplement: JB.01435-13_zjb999093206so1.pdf [file JB.01435-13_zjb999093206so1.pdf]

## Supplementary Material

### Displacement of pBSV2*BhresT* by pNB12

Clones resulting from transformation of GCB51 with pNB12 were found to contain both pBSV2*BhresT* (Km<sup>R</sup>) and pNB12 (Sm<sup>R</sup>). As pNB12 contains the same replication origin as pBSV2*BhresT* it was thought that these two plasmids should be incompatible and under selection for streptomycin, the selectable marker on pNB12, that pBSV2*BhresT* should be displaced from the cell (1-3). However, it has also been reported that the plasmid pKFSS1, from which pJSB104 is derived, is co-maintained with pBSV2 despite the fact that the two plasmids share the same replication origin and should be incompatible (4). Indeed, this is what was observed when GCB51 was transformed with pNB12. By increasing the amount of streptomycin our goal was to increase the number of copies of pNB12 relative to pBSV2*BhresT* until the latter was ultimately displaced from the cell. The pBSV2*BhresT* plasmid was displaced by serial passage in increasing concentrations of streptomycin : 2.5 mg/ml, 4 mg/ml, and 6 mg/ml. After each passage the cultures were plated in 96 well liquid plates at the same concentration of streptomycin and allowed to grow to late log phase. The bacteria were plated at a concentration of approximately 2.8 spirochetes/ml in 250 µl aliquots and allowed to grow until the wells turned yellow. These were then replica plated in 96 well liquid plates in fresh BSK-II containing 200 µg/ml kanamycin to screen for clones that were resistant to streptomycin but sensitive to kanamycin. Clones which grew in the presence of streptomycin but not in the presence of kanamycin were identified as potential displacement clones and screened by PCR for the loss of the *B. hermsii resT* gene using the primers B322 and B323, which are unique to the *B. hermsii resT* gene. Multiple clones were eventually recovered at 6 mg/ml streptomycin. Twelve were screened for the absence of *B. hermsii resT*; all clones screened were negative for the presence of *B. hermsii resT*. This represents a new approach for plasmid displacement in *B. burgdorferi*.

| <b>Table S1. Primers</b>                                                          |               |                      |                                                              |
|-----------------------------------------------------------------------------------|---------------|----------------------|--------------------------------------------------------------|
| <b>Primers used in construction of an inducible <i>resT</i> expression vector</b> |               |                      |                                                              |
| <b>Product</b>                                                                    | <b>Primer</b> | <b>Target</b>        | <b>Sequence<sup>1</sup></b>                                  |
| <i>PpQE30-resT</i>                                                                | B2145         | <i>PpQE30</i>        | BamHI - <b>ggatcct</b> ctagaaaatcataaaaaatttattgc            |
|                                                                                   | B2149         | <i>PpQE30 + resT</i> | CTTCACTTTTGGAGGCATatgtaatttctcctctttaatgaattc                |
|                                                                                   | B2150         | <i>PpQE30 + resT</i> | gaattcattaagaggagaaattacatATGCCTCCAAAAGTGAAG                 |
|                                                                                   | B2169         | <i>resT</i>          | XhoI - <b>ctcgag</b> CTATAGCTTATAATTAATAAATTATTGATAAGTATTCTG |
| pJSB104MCS                                                                        | B2155         | pJLB12g MCS          | HindIII - <b>aagctt</b> CTCGAGATCTATCG                       |
|                                                                                   | B2156         |                      | CGAATTCGAGCTCCC                                              |

<sup>1</sup> Lower case text indicates *PpQE30*, bold text represents added restriction site. All sequences are 5' to 3'.

| <b>Primers used for deletion of wild-type <i>resT</i></b> |               |                     |                                              |
|-----------------------------------------------------------|---------------|---------------------|----------------------------------------------|
| <b>Product</b>                                            | <b>Primer</b> | <b>Target</b>       | <b>Sequence<sup>1</sup></b>                  |
| $\Delta$ <i>resT::aadA</i>                                | B2209         | <i>bbb04</i>        | GTTTAACAAGTACCTTAACCTTATTTTTTG               |
|                                                           | B2210         | <i>bbb04 + aadA</i> | gatgctcgatgagttttctaaTTTTGTTTTTTAAATTCAGGC   |
|                                                           | B2211         | <i>bbb04 + aadA</i> | GCCTGAATTTAAAAAACAAAAAttagaaaaactcatcgagcatc |
|                                                           | B2212         | <i>aadA + bbb02</i> | CTCTACTTTTGCAGGAAAAAGAATAGtaccgagcttcaagga   |
|                                                           | B2213         | <i>aadA + bbb02</i> | tccttgaagctcgggtaCTATTCTTTTCTGCAAAAGTAGAG    |
|                                                           | B2214         | <i>bbb02</i>        | CAAATCTTGATTCTAATATTAGGGC                    |

<sup>1</sup> Lower case text represents *aadA* sequence+A48

| <b>Primers used for Southern blotting</b> |                        |               |                                |
|-------------------------------------------|------------------------|---------------|--------------------------------|
| <b>Target</b>                             | <b>Probe Generated</b> | <b>Primer</b> | <b>Sequence</b>                |
| lp17                                      | 12,980-13,727          | B2275         | GCTAAGACAGGAATTTTCCG           |
|                                           |                        | B2276         | GCAAATTCAAATCCCAATTC           |
|                                           | 4,854-5,431            | B2317         | CAATTATTGTATAGCTATCCAGAATAAAGG |
|                                           |                        | B2318         | GTAATAATATTTTTATTGATGAAAATTTGG |
| lp28-2                                    | 18,725-19,374          | B2295         | GGTGCATTTTTAGTAATTTTACTACT     |
|                                           |                        | B2296         | GATACTAAAAATTTTGTATTCCAGATGG   |
|                                           | 26,461-26,960          | B2331         | GGAGGTAAGGGGAGCAAG             |
|                                           |                        | B2332         | AGTGTGGAGATACAAAAACACAC        |

| <b>Primers used for screening</b> |                                   |                                                            |
|-----------------------------------|-----------------------------------|------------------------------------------------------------|
| <b>Primer</b>                     | <b>Sequence</b>                   | <b>Target</b>                                              |
| B2177                             | ATACGAATATGATTTTTATCTGCG          | Reverse primer internal to <i>resT</i> used for sequencing |
| B2178                             | ATACCTATATTGAAATAATTAAGCTTCTACTG  | Forward primer internal to <i>resT</i> used for sequencing |
| B2180                             | CCAAATAATGCCCGTG                  | Backbone of pJSB104 flanking the expression site           |
| B2181                             | CTTTCATGCGCTTAACG                 |                                                            |
| B2251                             | GAAATGTAAATCGTTCTATTGTCATTAG      | cp26 flanking the <i>resT</i> locus                        |
| B2252                             | GGTTGTCCATGGAACCAG                |                                                            |
| B322                              | CGACGTCGACGATAAGGATATACAAGTTTCTAC | Specific for <i>Borrelia hermsii resT</i>                  |
| B323                              | CTCCGTCGACGGATATCGAACATAAAAGCA    |                                                            |

| <b>Table S2. Strains and plasmids</b> |                                                                           |                                                                                                     |                          |                  |
|---------------------------------------|---------------------------------------------------------------------------|-----------------------------------------------------------------------------------------------------|--------------------------|------------------|
| <b><i>B. burgdorferi</i></b>          |                                                                           |                                                                                                     |                          |                  |
| <b>Strain (GCB)</b>                   | <b>Description</b>                                                        |                                                                                                     |                          | <b>Reference</b> |
| 908                                   | B31-A, wild-type <i>resT</i> parent strain                                |                                                                                                     |                          | (5)              |
| 2127                                  | GCB2093 with complete <i>resT</i> deletion                                |                                                                                                     |                          | This study       |
| 51                                    | Partial <i>resT</i> deletion complemented by <i>Borrelia hermsii resT</i> |                                                                                                     |                          | (6)              |
| 2103                                  | GCB51 with pBSV2 <i>BhresT</i> displaced by pNB12                         |                                                                                                     |                          | This study       |
| <b><i>E. coli</i></b>                 |                                                                           |                                                                                                     |                          |                  |
| <b>Strain (GCE)</b>                   | <b>Plasmid</b>                                                            | <b>Description</b>                                                                                  | <b>Strain background</b> | <b>Reference</b> |
| 2753                                  | pJSB104                                                                   | Carries IPTG inducible expression vector                                                            | DH5α                     | (7)              |
| 2755                                  | pJSB104MCS                                                                | Carries pJSB104MCS                                                                                  | DH5α                     | This study       |
| 2773                                  | pNB12                                                                     | Inducible <i>resT</i> expression plasmid                                                            | DH5α                     |                  |
| 2769                                  | pNB13                                                                     | Plasmid for targeted knock-out of the <i>bbb03</i> locus through homologous recombination           | DH5α                     |                  |
|                                       |                                                                           |                                                                                                     |                          |                  |
| <b>Plasmid</b>                        | <b>Selectable Marker</b>                                                  | <b>Description</b>                                                                                  | <b>Reference</b>         |                  |
| pJSB104                               | Strep                                                                     | IPTG inducible expression vector                                                                    | (7)                      |                  |
| pBSV2 <i>BhresT</i>                   | Kan                                                                       | Plasmid constitutively expressing <i>resT</i> from <i>Borrelia hermsii</i>                          | (6)                      |                  |
| pJLB12g                               | Kan                                                                       | Plasmid for targeted mutagenesis of <i>B. burgdorferi</i>                                           | (5)                      |                  |
| pJSB104MCS                            | Strep                                                                     | pJSB104 with the MCS from pJLB12g inserted at the HindIII site                                      | This study               |                  |
| pNB12                                 | Strep                                                                     | pJSB104MCS containing <i>resT</i> in the expression site                                            |                          |                  |
| pNB13                                 | Strep                                                                     | <i>resT</i> KO plasmid with 500 bp on either side of <i>resT</i> locus flanking <i>kan</i> cassette |                          |                  |

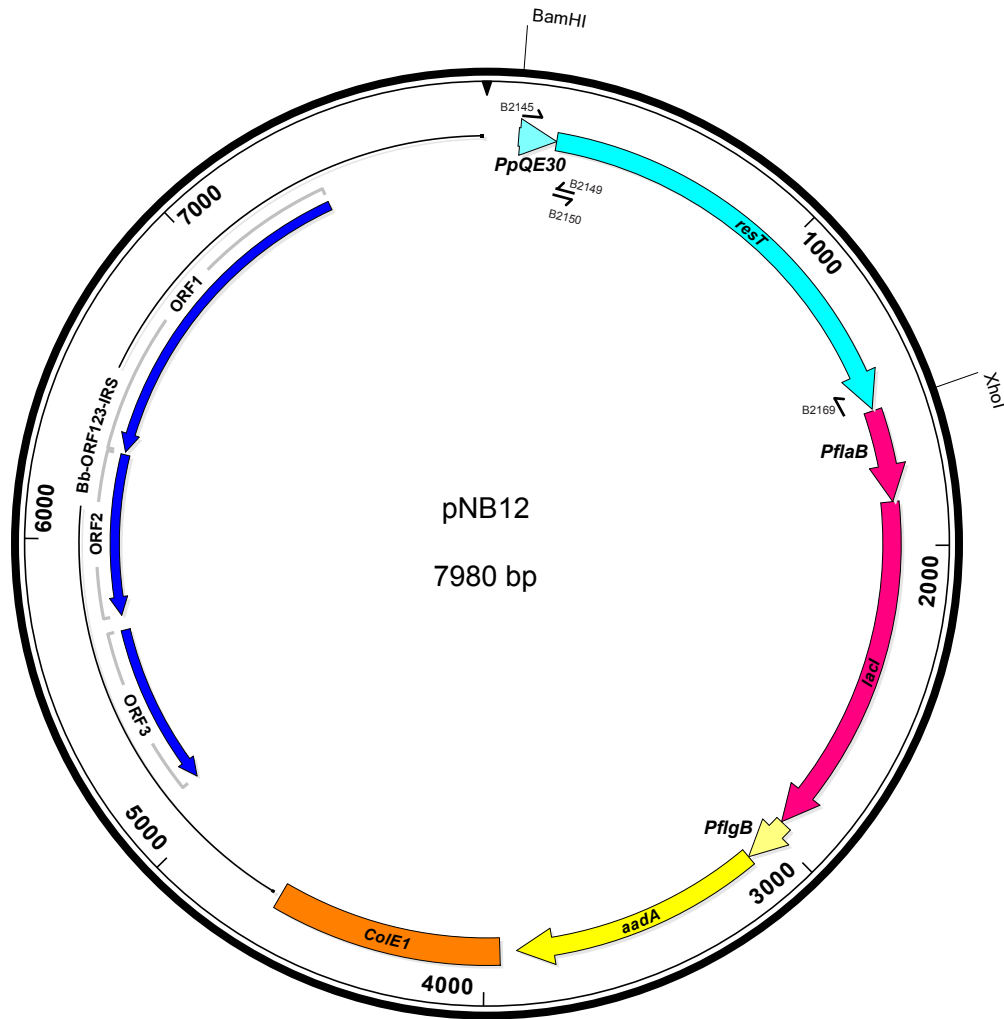

**Fig. S1.** Map of pNB12. Wild-type *resT* was amplified from B31-A (GCB908) genomic DNA and inserted into the inducible expression plasmid pJSB104 (7) to generate plasmid pNB12 (see Materials and Methods for plasmid construction). Briefly, the *resT* gene is under control of the *PpQE30* promoter, which is controlled by the *lac* repressor and two *lac* operators upstream of the *resT* gene. The plasmid is selectable with streptomycin due to the *aadA* gene. *E. coli* and *B. burgdorferi* replication regions are also shown.

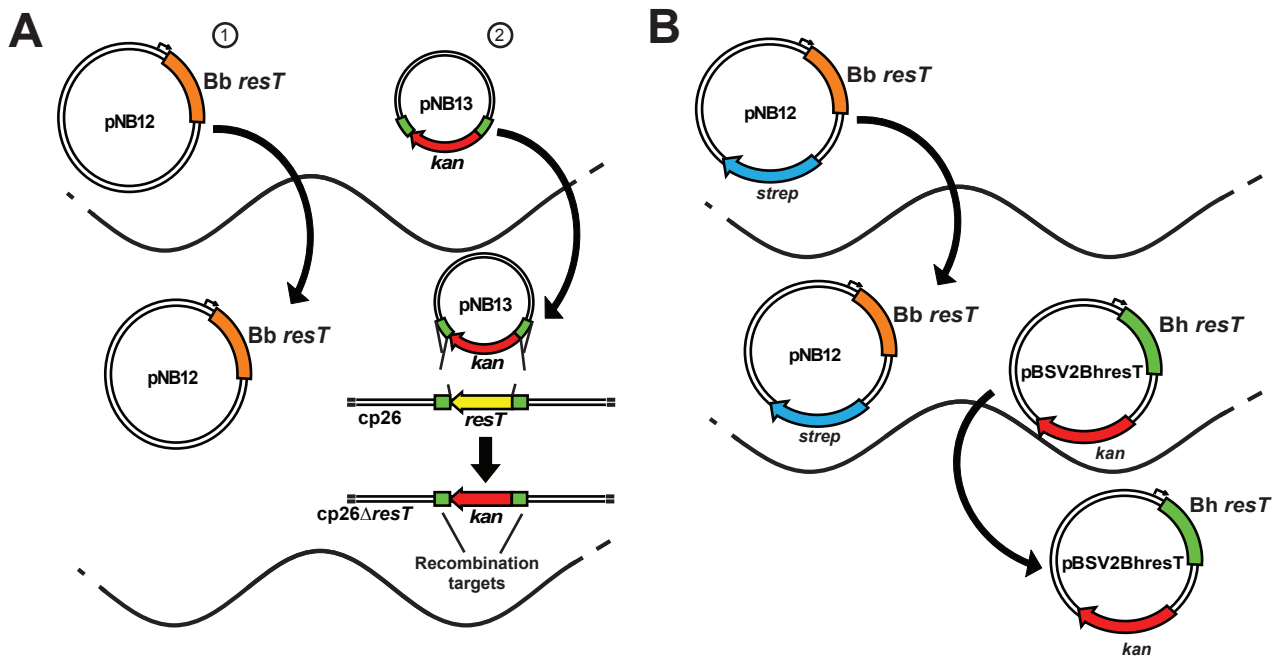

**Fig. S2.** Strategies for generating a conditional *resT* mutant *B. burgdorferi*. **A)** In strain B31-A *resT* was knocked-out in a two step process. First *B. burgdorferi* was transformed with the plasmid pNB12 which contains a *resT* gene under the IPTG inducible *PpQE30* promoter. Next, the strain was transformed with the recombination plasmid pNB13 which targets the native *resT* on cp26, completely deleting the gene through allelic exchange and replacing it with a kanamycin resistance cassette (GCB2127). **B)** pNB12 was also used to transform the strain GCB51, a B31-A derivative which contains a partial deletion of the native *resT* on cp26, but which is complemented by the plasmid pBSV2BhresT, which expresses the related *Borrelia hermsii resT* (6). As the two plasmids have the same backbone, the streptomycin resistant plasmid carrying an inducible *resT* gene was expected to displace the kanamycin resistant plasmid carrying the *B. hermsii resT* gene. However this was not the case and displacement of pBSV2BhresT was accomplished (GCB2103) through growth of the strain in increasing concentration of streptomycin (see text).

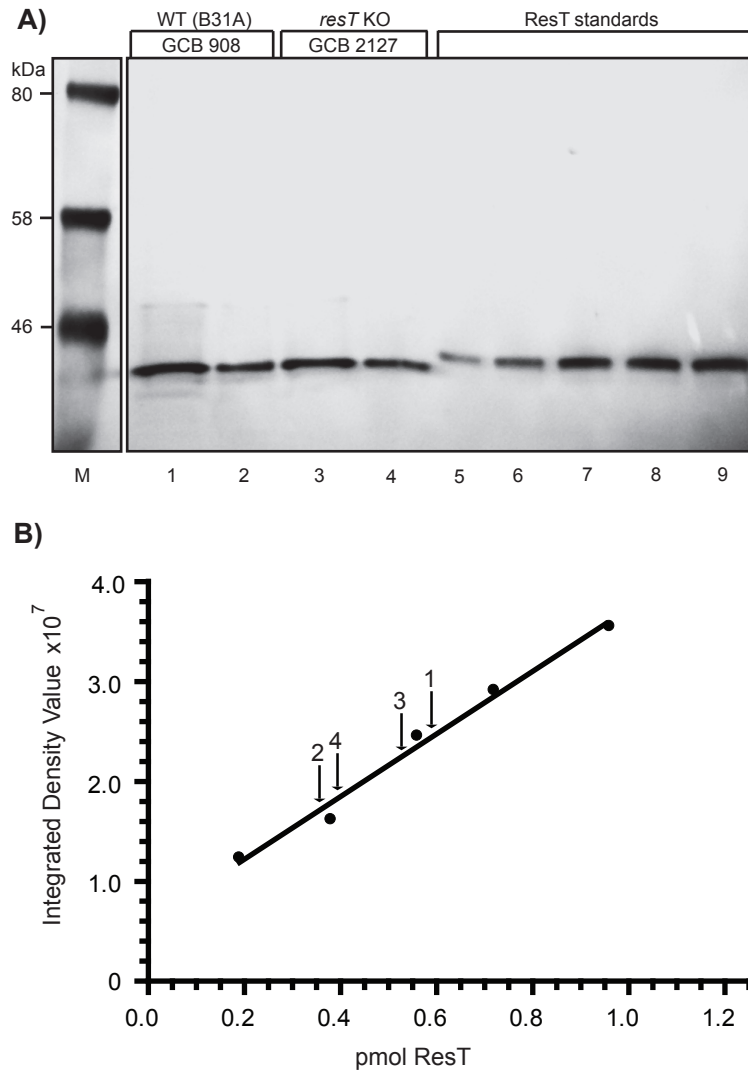

**Fig. S3.** Western blot for determination of ResT abundance. **A)** To determine the cellular levels of ResT, a Western blot was performed on whole *B. burgdorferi* cell lysates using the high-passage wild-type parent strain B31-A (GCB908) and the ResT-inducible strain (GCB2127) along with known amounts of purified ResT. Band intensities were quantified AlphaEaseFC software and a FluorChem8900 Imager (Alpha Innotech). M Indicates the prestained protein marker used. Lanes 1 and 2 show wild type lysates (B31A) loaded at  $2.0 \times 10^7$  and  $1.0 \times 10^7$  spirochetes per well, respectively. Lanes 3 and 4 contained the inducible strain (GCB2127) loaded at  $2.0 \times 10^7$  and  $1.0 \times 10^7$  spirochetes per well, respectively. Lanes 5 - 9 contained 0.19, 0.38, .56, .72 and .96 pmoles of purified recombinant his-tagged ResT, respectively (kindly provided by Kerri Kobryn). **B)** Densitometric analysis of bands 5-9 shown in part A plotted as a standard curve used for calculation of ResT levels in wild-type strain (GCB908) and inducible strain (GCB2127). Numbers 1, 2, 3, and 4 correspond to the lanes in part A with arrows showing the amount calculated using the standard curve. The mean and standard deviation for ResT abundance was calculated as  $14,000 \pm 2,000$  monomers per spirochete in the conditional expression strain and  $15,000 \pm 1,000$  monomers per spirochete in the parental strain.

## References

1. **Eggers CH, Caimano MJ, Clawson ML, Miller WG, Samuels DS, Radolf JD.** 2002. Identification of loci critical for replication and compatibility of a *Borrelia burgdorferi* cp32-based shuttle vector for the expression of fluorescent reporters in the Lyme disease spirochete. *Molecular microbiology* **43**:281-295.
2. **Stewart PE, Chaconas G, Rosa P.** 2003. Conservation of plasmid maintenance functions between linear and circular plasmids in *Borrelia burgdorferi*. *Journal of bacteriology* **185**:3202-3209.
3. **Stewart PE, Thalken R, Bono JL, Rosa P.** 2001. Isolation of a circular plasmid region sufficient for autonomous replication and transformation of infectious *Borrelia burgdorferi*. *Molecular microbiology* **39**:714-721.
4. **Frank KL, Bundle SF, Kresge ME, Eggers CH, Samuels DS.** 2003. *aadA* confers streptomycin resistance in *Borrelia burgdorferi*. *Journal of bacteriology* **185**:6723-6727.
5. **Bono JL, Elias AF, Kupko JJ, III, Stevenson B, Tilly K, Rosa P.** 2000. Efficient targeted mutagenesis in *Borrelia burgdorferi*. *Journal of bacteriology* **182**:2445-2452.
6. **Tourand Y, Bankhead T, Wilson SL, Putteet-Driver AD, Barbour AG, Byram R, Rosa PA, Chaconas G.** 2006. Differential telomere processing by *Borrelia* telomere resolvases *in vitro* but not *in vivo*. *Journal of bacteriology* **188**:7378-7386.
7. **Blevins JS, Revel AT, Smith AH, Bachlani GN, Norgard MV.** 2007. Adaptation of a luciferase gene reporter and lac expression system to *Borrelia burgdorferi*. *Applied and environmental microbiology* **73**:1501-1513.
